# Supplementary material for: New types of di-, tetra-, hexa- and octanuclear Ag(i) complexes containing 1,3-adamantanedicarboxylic acid
Source: Royal Society of Chemistry journal article supplement (doi:10.1039/b909309e), 2009-01-01
Supplement: b909309e.pdf [file b909309e.pdf]

## Electronic Supplementary Information (ESI)

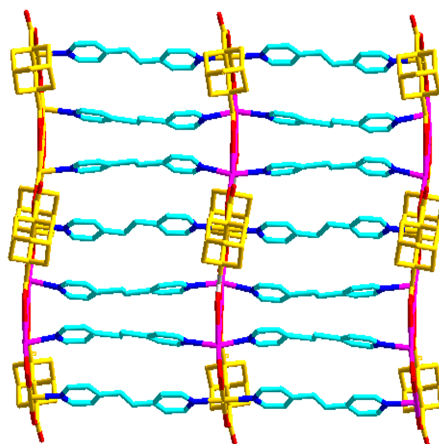

Figure S1. 2D (4,4) sheet structure with quadrangle grids in 4

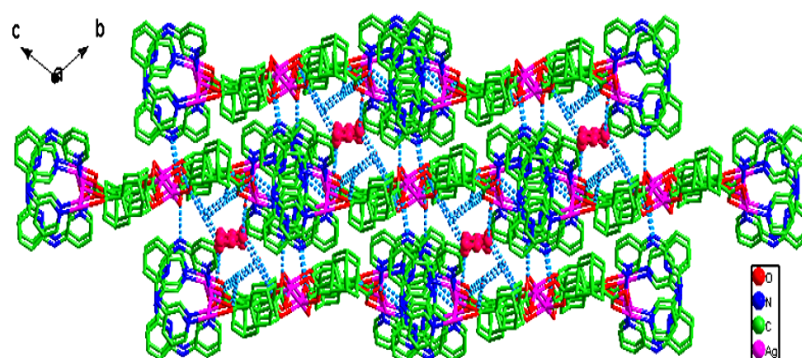

Figure S2. 3D structure formed by hydrogen-bonding interactions in 7.  $C_2H_5OH$  molecules are in red.

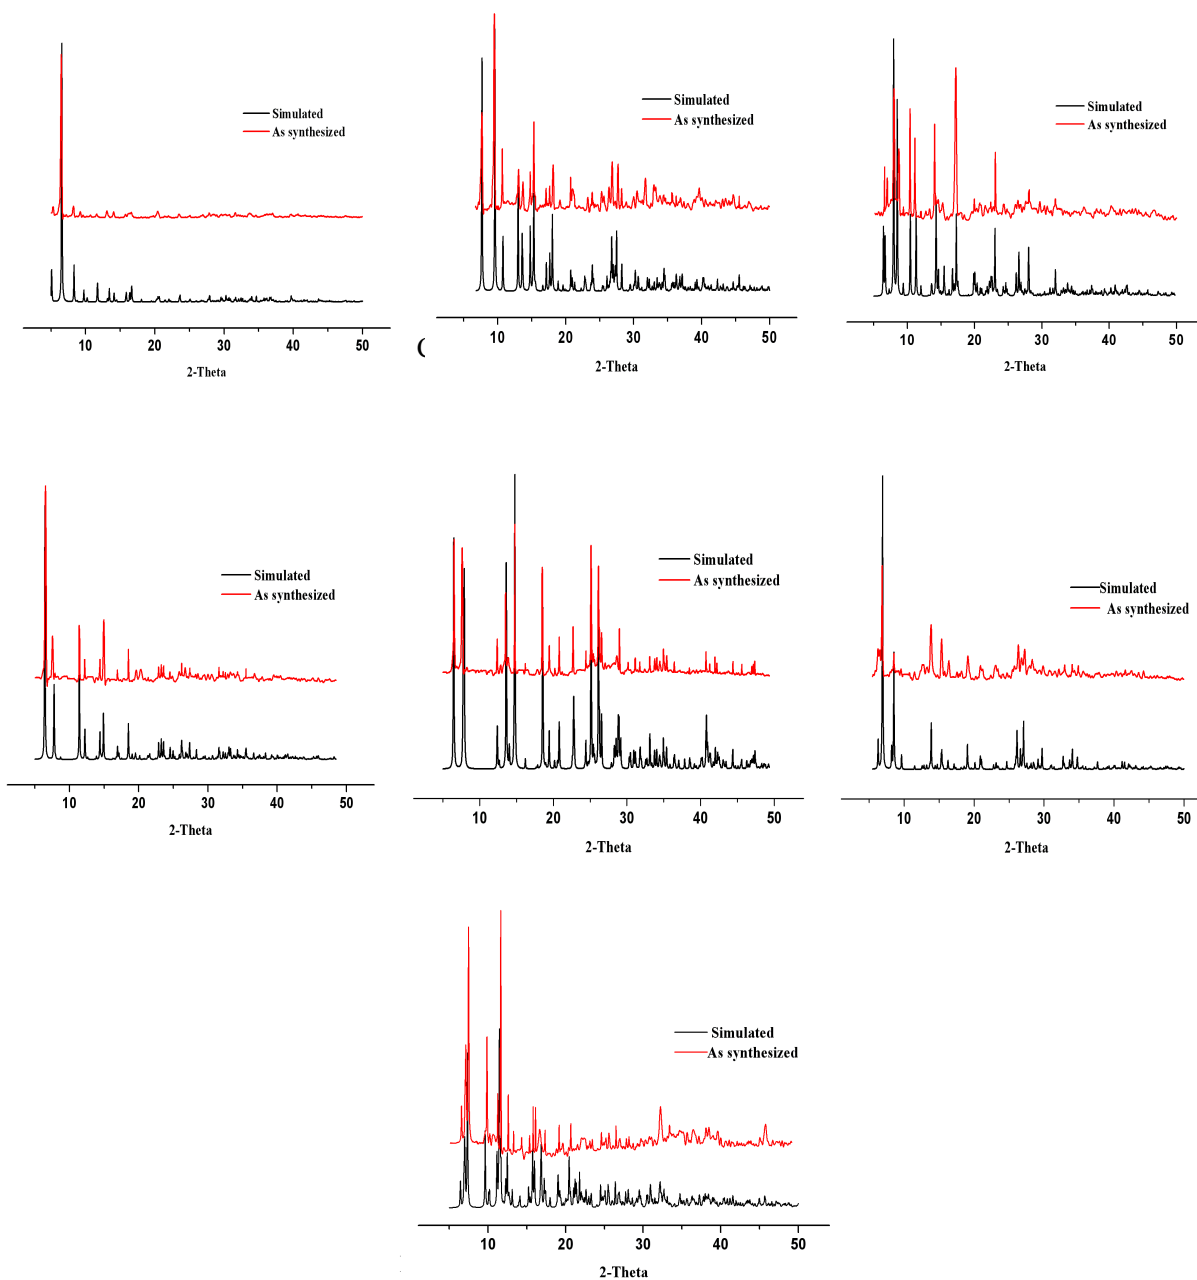

Figure S3. X-ray diffraction patterns of 1–7.

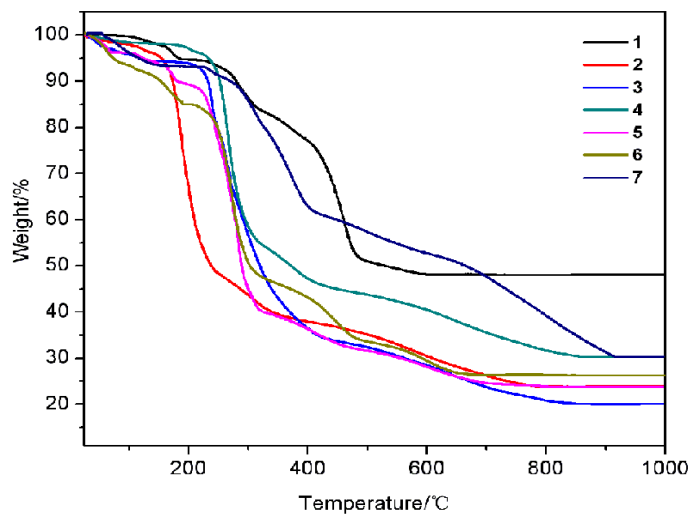

**Figure S4.** TGA curves of complexes 1–7 under N<sub>2</sub> atmosphere.

**Table S1**

Selected bond lengths [Å] and angles [°] for complexes **1–7**.

| <b>Complex 1</b>   |            |                    |             |                    |            |
|--------------------|------------|--------------------|-------------|--------------------|------------|
| Ag(1)-O(8)         | 2.220(6)   | Ag(1)-O(9A)        | 2.235(5)    | Ag(1)-O(3)         | 2.520(5)   |
| Ag(1)-O(13)        | 2.560(18)  | Ag(1)-Ag(3)        | 3.2763(11)  | Ag(1)-Ag(4D)       | 3.425 (11) |
| Ag(1)-Ag(5)        | 2.8215(11) | Ag(1)-Ag(6)        | 3.1101(12)  | O(8)-Ag(1)-O(9A)   | 154.1(2)   |
| O(8)-Ag(1)-O(3)    | 101.46(19) | O(9A)-Ag(1)-O(3)   | 93.58(19)   | O(8)-Ag(1)-O(13)   | 84.7(4)    |
| O(9A)-Ag(1)-O(13)  | 118.5(4)   | O(3)-Ag(1)-O(13)   | 81.7(5)     | Ag(2)-O(2)         | 2.237(6)   |
| Ag(2)-O(6B)        | 2.206(5)   | Ag(2)-O(7E)        | 2.626(16)   | Ag(2)-O(10A)       | 2.585(5)   |
| Ag(2)-Ag(2B)       | 2.8298(14) | O(6B)-Ag(2)-O(2)   | 160.1(2)    | O(6B)-Ag(2)-O(10A) | 118.36(19) |
| O(2)-Ag(2)-O(10A)  | 78.75(19)  | O(6B)-Ag(2)-O(7E)  | 93.306(43)  | O(7E)-Ag(2)-O(2)   | 88.220(42) |
| O(7E)-Ag(2)-O(10A) | 113.43(43) | Ag(3)-O(6C)        | 2.516(5)    | Ag(3)-O(7A)        | 2.45(2)    |
| Ag(3)-O(11)        | 2.190(5)   | Ag(3)-O(14)        | 2.132(14)   | Ag(3)-Ag(5)        | 3.386 (13) |
| Ag(3)-Ag(6)        | 2.8123(11) | O(14)-Ag(3)-O(11)  | 158.2(4)    | O(14)-Ag(3)-O(7)   | 106.2(7)   |
| O(11)-Ag(3)-O(7)   | 87.3(6)    | O(14)-Ag(3)-O(6C)  | 113.6(4)    | O(11)-Ag(3)-O(6C)  | 85.04(19)  |
| O(7)-Ag(3)-O(6C)   | 80.7(6)    | Ag(4)-O(3D)        | 2.231(5)    | Ag(4)-O(4)         | 2.213(15)  |
| Ag(4)-OW(5)        | 2.467(6)   | Ag(4)-O(13D)       | 2.712 (18)  | Ag(4)-Ag(4D)       | 2.7930(14) |
| O(4)-Ag(4)-O(3D)   | 165.1(4)   | O(4)-Ag(4)-OW(5)   | 92.7(4)     | O(3D)-Ag(4)-OW(5)  | 98.3(2)    |
| O(4)-Ag(4)-O(13D)  | 97.684(52) | O(3D)-Ag(4)-O(13D) | 94.851(38)  | OW(5)-Ag(4)-O(13D) | 75.101(38) |
| Ag(5)-OW(1)        | 2.565(10)  | Ag(5)-O(7)         | 2.197(17)   | Ag(5)-O(10A)       | 2.176(5)   |
| Ag(5)-O(11)        | 2.657(6)   | Ag(5)-Ag(5E)       | 3.3312(15)  | O(10A)-Ag(5)-O(7)  | 169.2(5)   |
| O(10A)-Ag(5)-OW(1) | 117.31(15) | O(7)-Ag(5)-OW(1)   | 65.0(4)     | O(10A)-Ag(5)-O(11) | 95.54(18)  |
| O(7)-Ag(5)-O(11)   | 89.28(48)  | OW(1)-Ag(5)-O(11)  | 132.22(12)  | Ag(6)-OW(5D)       | 2.572(6)   |
| Ag(6)-O(12)        | 2.192(16)  | Ag(6)-O(13)        | 2.093(16)   | O(13)-Ag(6)-O(12)  | 158.5(10)  |
| O(13)-Ag(6)-OW(5D) | 84.7(5)    | O(12)-Ag(6)-OW(5D) | 112.9(5)    |                    |            |
| <b>Complex 2</b>   |            |                    |             |                    |            |
| Ag(1)-N(2B)        | 2.184(3)   | Ag(1)-N(1)         | 2.188(4)    | Ag(1)-O(1)         | 2.688(3)   |
| Ag(1)-O(2A)        | 2.8425(34) | Ag(1)-Ag(1A)       | 3.0685(8)   | N(2B) -Ag(1)-N(1)  | 166.15(14) |
| N(2B)-Ag(1)-O(1)   | 95.32(11)  | N(1)-Ag(1)-O(1)    | 92.10(12)   | N(2B)-Ag(1)-O(2A)  | 88.569(13) |
| N(1)-Ag(1)-O(2A)   | 88.568(13) | O(2A)-Ag(1)-O(1)   | 159.399(12) |                    |            |
| <b>Complex 3</b>   |            |                    |             |                    |            |
| Ag(1)-N(2)         | 2.210(2)   | Ag(1)-N(1)         | 2.211(2)    | Ag(1)-O(1)         | 2.499(2)   |
| Ag(1)-O(2)         | 2.6360(24) | Ag(1)-Ag(1A)       | 3.0076(5)   | N(2)-Ag(1)-N(1)    | 146.22(9)  |
| N(2)-Ag(1)-O(1)    | 114.41(9)  | N(1)-Ag(1)-O(1)    | 98.82(9)    | N(2)-Ag(1)-O(2)    | 94.855(73) |

|                   |             |                  |            |                   |             |
|-------------------|-------------|------------------|------------|-------------------|-------------|
| N(1)-Ag(1)-O(2)   | 111.869(76) | O(1)-Ag(1)-O(2)  | 50.011(69) |                   |             |
| <b>Complex 4</b>  |             |                  |            |                   |             |
| Ag(1)-O(3)        | 2.152(6)    | Ag(1)-Ag(2)      | 2.9042(15) | O(3A)-Ag(1)-O(3)  | 176.0(3)    |
| Ag(2)-N(2)        | 2.229(5)    | Ag(2)-N(1B)      | 2.240(5)   | Ag(2)-O(4C)       | 2.333(7)    |
| Ag(2)-O(2A)       | 2.7972(79)  | N(2)-Ag(2)-N(1B) | 153.7(2)   | N(2)-Ag(2)-O(4C)  | 100.7(2)    |
| N(1B)-Ag(2)-O(4C) | 105.4(2)    | N(2)-Ag(2)-O(2A) | 82.229(23) | N(1B)-Ag(2)-O(2A) | 84.562(23)  |
| O(4C)-Ag(2)-O(2A) | 127.59(257) | Ag(3)-O(4)       | 2.715(8)   | Ag(3)-N(3)        | 2.156(4)    |
| N(3)-Ag(3)-N(3C)  | 180.0       | N(3)-Ag(3)-O(4)  | 90.7(2)    | N(3C)-Ag(3)-O(4)  | 89.3(2)     |
| <b>Complex 5</b>  |             |                  |            |                   |             |
| Ag(1)-N(1)        | 2.204(5)    | Ag(1)-N(2A)      | 2.214(5)   | Ag(1)-O(1)        | 2.603(4)    |
| N(1)-Ag(1)-N(2A)  | 171.0(2)    | N(1)-Ag(1)-O(1)  | 95.24(17)  | N(2A)-Ag(1)-O(1)  | 93.00(16)   |
| O(1)-Ag(1)-O(1B)  | 48.94(12)   |                  |            |                   |             |
| <b>Complex 6</b>  |             |                  |            |                   |             |
| Ag(1)-N(1)        | 2.191(8)    | Ag(1)-N(2)       | 2.221(7)   | Ag(1)-O(1A)       | 2.7012(65)  |
| N(1)-Ag(1)-N(2)   | 170.9(4)    | N(2)-Ag(1)-O(1A) | 94.896(13) | N(1)-Ag(1)-O(1A)  | 93.457(13)  |
| O(1A)-Ag(1)-O(1B) | 48.568(18)  | Ag(2)-N(4)       | 2.193(8)   | Ag(2)-N(3C)       | 2.205(8)    |
| N(4)-Ag(2)-N(3C)  | 177.2(4)    |                  |            |                   |             |
| <b>Complex 7</b>  |             |                  |            |                   |             |
| Ag(1)-O(3)        | 2.455(6)    | Ag(1)-O(4)       | 2.6098(5)  | Ag(1)-O(7)        | 2.279(6)    |
| Ag(1)-O(8A)       | 2.218(6)    | Ag(1)-Ag(1A)     | 2.8847(14) | O(7)-Ag(1)-O(3)   | 105.5(3)    |
| O(8A)-Ag(1)-O(3)  | 114.4(3)    | O(8A)-Ag(1)-O(7) | 139.9(3)   | O(8A)-Ag(1)-O(4)  | 100.478(11) |
| O(7)-Ag(1)-O(4)   | 108.180(11) | O(3)-Ag(1)-O(4)  | 50.487(8)  | Ag(2)-N(1)        | 2.127(7)    |
| Ag(2)-N(6)        | 2.148(7)    | Ag(2)-O(2)       | 2.505(7)   | Ag(2)-Ag(3)       | 2.9452(10)  |
| Ag(2)-Ag(4)       | 3.0326(10)  | N(1)-Ag(2)-N(6)  | 164.7(3)   | N(1)-Ag(2)-O(2)   | 101.5(3)    |
| N(6)-Ag(2)-O(2)   | 91.0(3)     | Ag(3)-O(1)       | 2.135(6)   | Ag(3)-N(2)        | 2.133(7)    |
| O(1)-Ag(3)-N(2)   | 178.1(3)    | Ag(4)-O(5)       | 2.120(7)   | Ag(4)-O(6)        | 2.6388(5)   |
| Ag(4)-N(7)        | 2.122(8)    | O(5)-Ag(4)-N(7)  | 174.0(4)   | O(6)-Ag(4)-N(7)   | 122.84(13)  |
| O(5)-Ag(4)-O(6)   | 53.023(10)  |                  |            |                   |             |

[a] **Symmetry codes:** For 1: A x, -y+1, z-1/2; B -x+1, -y+1, -z+1; C x, -y+1, z+1/2; D -x, -y+1, -z+1; E -x+1, y, -z+3/2.  
For 2: A -x+2, -y, -z+2; B x, y-1, z. For 3: A -x+1, -y+1, -z+2; B x-1/2, -y+1/2, z-1/2; C x+1/2, -y+1/2, z+1/2. For 4: A -x+2, y, -z+1/2; B x, y+1, z; C -x+2, -y+2, -z. For 5: A -1+x, y, z; B x, -y+3/2, z. For 6: A 1+x, y, z; B 1+x, 1/2-y, z; C 1+x, y, 1+z. For 7: A 1-x, 1-y, 1-z.

**Table S2**

Hydrogen-bonding lengths and angles for compounds **2** and **5–7**.

| Compound | D–H···A                    | D–H (Å) | H···A (Å) | D···A (Å)  | D–H···A (°) |
|----------|----------------------------|---------|-----------|------------|-------------|
| <b>2</b> | O(3)–H(3)···O(1)#1         | 0.82    | 1.76      | 2.5763(3)  | 173.4       |
| <b>5</b> | OW(4)–H(4WA)···O(1)        | 0.82    | 1.93      | 2.7054(69) | 157.5       |
|          | O(3)#1–H(3)#1···OW(4)      | 0.82    | 1.77      | 2.5647(83) | 162.5       |
| <b>6</b> | OW(11)–H(11C)···O(1)#1     | 0.88    | 1.95      | 2.8202(70) | 169.6       |
|          | OW(12)–H(12B)···OW(13)     | 0.86    | 1.97      | 2.8145(34) | 111.3       |
|          | OW(13)–H(13C)···O(2)       | 0.79    | 1.96      | 2.7355(10) | 171.5       |
|          | OW(14)–H(14C)···O(2)       | 0.85    | 2.08      | 2.9255(20) | 172.4       |
|          | OW(15)–H(15C)···O(1)       | 0.80    | 2.51      | 3.3166(99) | 177.3       |
|          | C(8)#2–H(8A)···OW(11)      | 0.93    | 2.50      | 3.2737(12) | 141.7       |
|          | C(13)–H(13A)···OW(12)      | 0.93    | 2.36      | 3.2691(28) | 166.2       |
|          | C(20)#3–H(20A)···OW(15)    | 0.93    | 2.71      | 3.3966(69) | 131.3       |
| <b>7</b> | OW(9)–H(9C)···OW(10)#1     | 0.80    | 1.93      | 2.7230(8)  | 174.7       |
|          | OW(10)#1–H(10A)···O(7)#2   | 0.80    | 2.00      | 2.7946(7)  | 179.1       |
|          | OW(10)#1–H(10B)···OW(12)#2 | 0.80    | 2.01      | 2.8133(4)  | 179.7       |
|          | OW(12)#2–H(12A)···O(2)#2   | 0.80    | 2.02      | 2.8153(3)  | 179.7       |
|          | OW(12)#2–H(12B)···O(5)#2   | 0.80    | 1.94      | 2.7371(4)  | 179.1       |
|          | OW(11)#3–H(11D)···OW(9)    | 0.80    | 1.74      | 2.549(4)   | 175.8       |
|          | OW(11)#3–H(11C)···O(1)#4   | 0.80    | 3.04      | 3.2946(6)  | 101.5       |
|          | N(3)#5–H(3C)···OW(11)#3    | 0.86    | 2.09      | 2.9280(4)  | 166.1       |

For **2**: #1 -x+1, -y, -z+2. For **5**: #1 1-x, -1/2+y, 1-z. For **6**: #1 x+1, y, z; #2 -x+1, y+1/2, -z; #3 -x+1, y+1/2, -z+1. For **7**: #1 x, y, 1+z; #2 1-x, 1-y, 2-z; #3 1-x, 1-y, 1-z; #4 -1+x, y, z; #5 1-x, -y, 2-z.
